# Supplementary material for: Spin-dependent electronic transport properties of zigzag silicon carbon nanoribbon
Source: Royal Society of Chemistry journal article supplement (doi:10.1039/c5ra24276b), 2015-01-01
Supplement: c5ra24276b1.pdf [file c5ra24276b1.pdf]

## Supplementary Data

### Spin-dependent electronic transport properties of zigzag Silicon Carbon nanoribbon

Yipeng An<sup>\*a</sup>, Mengjun Zhang<sup>a</sup>, Lipeng Chen<sup>b</sup>, Congxin Xia<sup>\*a</sup>, Tianxing Wang<sup>a</sup>,

Zhaoming Fu<sup>ac</sup>, Zhaoyong Jiao<sup>a</sup>, Guoliang Xu<sup>a</sup>

*<sup>a</sup>College of Physics and Electronic engineering, Henan Normal University, Xinxiang 453007, China.*

*E-mail address: ypan@htu.edu.cn; xiacongxin@htu.edu.cn; Fax: +86 373 3329346.*

*<sup>b</sup>Division of Materials Science, Nanyang Technological University, 50 Nanyang Avenue, Singapore 639798, Singapore.*

*<sup>c</sup>Beijing National Laboratory for Condensed Matter Physics, Institute of Physics, Chinese Academy of Sciences, Beijing 100190, China.*

---

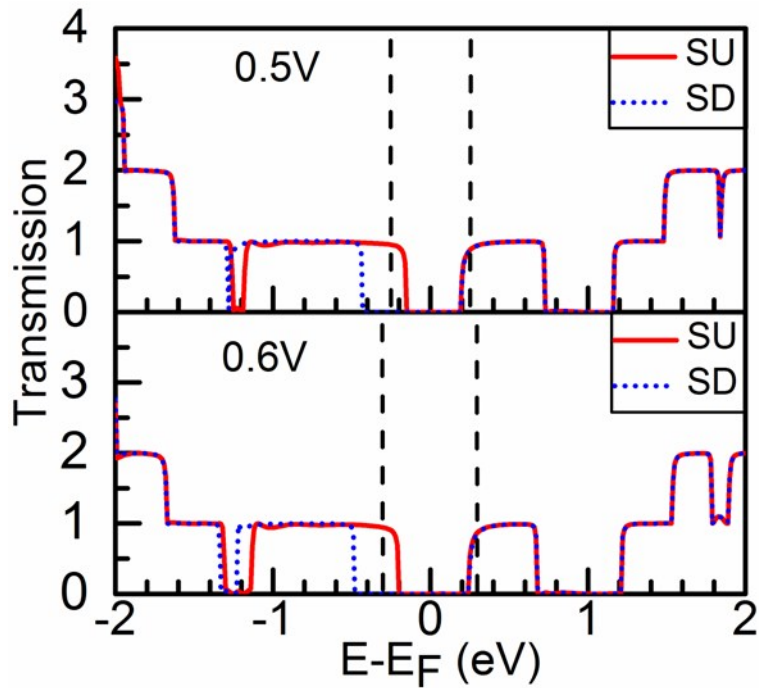

**Figure S1.** The spin-dependent transmission spectra of the FM state under the biases of 0.5 and 0.6 V. The black dotted lines refer to the bias window.

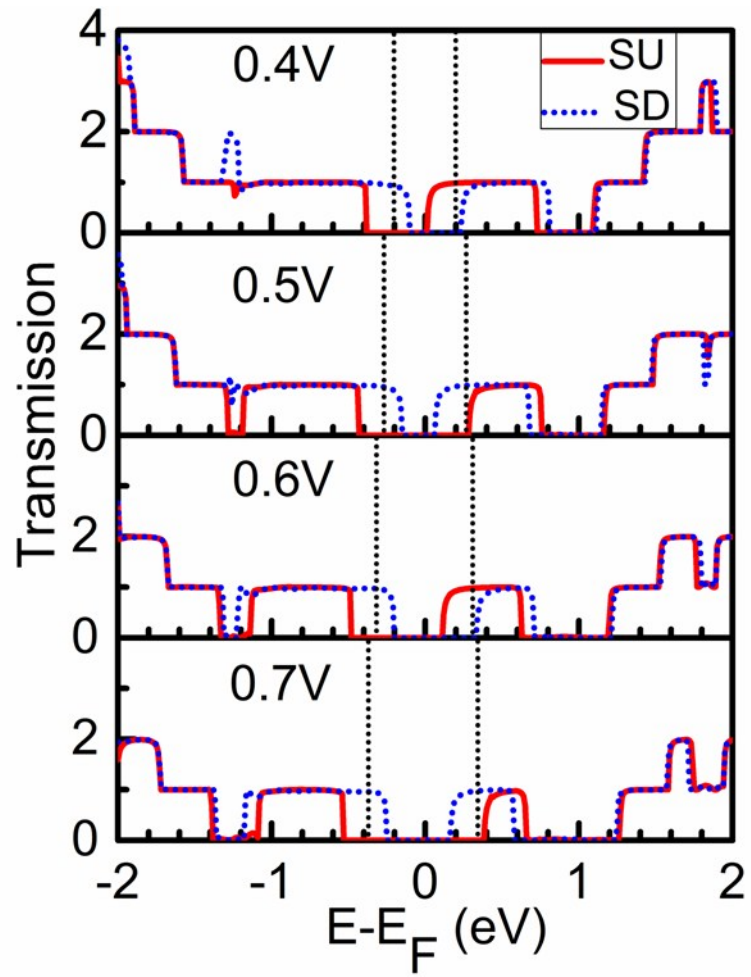

**Figure S2.** The spin-dependent transmission spectra of the AFM state under the biases of 0.4, 0.5, 0.6, and 0.7 V, respectively.
